# Supplementary material for: Statin Use and Primary Open-Angle Glaucoma Severity in Patients of African Ancestry
Source: Research Square preprint supplement (doi:10.21203/rs.3.rs-9911540/v1), 2026-06-11
Supplement: Supplementary file 1 [file 26b986a490a12f1e04da31a3.xlsx]

## Sheet: Sheet1
Table 2 – Demographic Characteristics Comparison of POAG Cases Using Statins and not Using Statins in Patients of African Ancestry in UPHS
Characteristic	Statistics	POAG cases not using statins	POAG cases using statins	P-value	Mean Difference (95% CI)	Odds Ratio (95% CI)
		(N=1032)	(N=1381)
Age (Years)	N	1032	1381	0.005	-1.38 (-2.33, -0.42)
	Mean (SD)	70.89 (12.83)	69.52 (10.45)
	Median (Q1, Q3)	72.00 (61.00, 81.00)	70.00 (62.00, 77.00)
	Min, Max	35.0, 103.0	38.0, 98.0
Sex, n(%)	Male	389 (37.69)	567 (41.06)	0.09		Ref
	Female	643 (62.31)	814 (58.94)			0.87 (0.74, 1.02)
Body Mass Index (kg/m2)	N	1028	1375	<0.001	1.64 (1.12, 2.17)
	Mean (SD)	28.71 (6.44)	30.36 (6.56)
	Median (Q1, Q3)	27.65 (24.40, 31.90)	29.40 (25.80, 34.20)
	Min, Max	14.1, 58.7	15.5, 70.5
Diabetes Mellitus History, n(%)	No	727 (70.72)	705 (51.35)	<0.001		Ref
	Yes	301 (29.28)	668 (48.65)			2.29 (1.93, 2.72)
Hypertension History, n(%)	No	293 (28.53)	229 (16.65)	<0.001		Ref
	Yes	734 (71.47)	1146 (83.35)			2.00 (1.64, 2.43)
Family Glaucoma History, n(%)	No	407 (42.71)	544 (42.40)	0.88		Ref
	Yes	546 (57.29)	739 (57.60)			1.01 (0.85, 1.20)
Previous Glaucoma Surgery , n(%)	No	708 (69.21)	1043 (76.19)	<0.001		Ref
	Yes	315 (30.79)	326 (23.81)			0.70 (0.59, 0.84)
Age at Glaucoma Diagnosis (Years)	N	156	201	0.92	0.15 (-2.65, 2.95)
	Mean (SD)	66.02 (14.18)	66.17 (12.14)
	Median (Q1, Q3)	67.00 (56.00, 76.00)	67.00 (60.00, 74.00)
	Min, Max	20.0, 93.0	30.0, 93.0
Tobacco Use, n(%)	No	500 (48.97)	587 (43.48)	0.008		Ref
	Yes	521 (51.03)	763 (56.52)			1.25 (1.06, 1.47)
Alcohol Use, n(%)	No	534 (52.61)	674 (50.04)	0.22		Ref
	Yes	481 (47.39)	673 (49.96)			1.11 (0.94, 1.30)
Statin Potency, n(%)	High Potency	0	993 (71.90)
	Low Potency	0	388 (28.10)
	No	1032 (100.00)	0
Beta Blocker User, n(%)	No	772 (74.81)	797 (57.71)	<0.001		Ref
	Yes	260 (25.19)	584 (42.29)			2.18 (1.82, 2.60)
The p-value of categorical variables are calculated based on chi-square test, Wald Confidence interval of Odds ratio is derived.
The p-value and mean difference (95% CI) of numeric variables are calculated based on t-test
