# Supplementary material for: Statin Use and Primary Open-Angle Glaucoma Severity in Patients of African Ancestry
Source: Research Square preprint supplement (doi:10.21203/rs.3.rs-9911540/v1), 2026-06-11
Supplement: Supplementary file 2 [file 55caa1ed51c50a6e205772d9.xlsx]

## Sheet: Sheet1
Table 1 - Statin Medication Use Summary of Patients of African Ancestry in the UPHS System
Characteristics	Control	Case
	(N=3302 Eye=6604)	(N=2413 Eye=4826)
Statin Potency, n(%)
High Potency	1613 (48.85)	993 (41.15)
Low Potency	357 (10.81)	388 (16.08)
No	1332 (40.34)	1032 (42.77)
Lovastatin, n(%)
No	3260 (98.73)	2356 (97.64)
Yes	42 (1.27)	57 (2.36)
Atorvastatin, n(%)
No	2006 (60.75)	1602 (66.39)
Yes	1296 (39.25)	811 (33.61)
Rosuvastatin, n(%)
No	2976 (90.13)	2219 (91.96)
Yes	326 (9.87)	194 (8.04)
Simvastatin, n(%)
No	3100 (93.88)	2168 (89.85)
Yes	202 (6.12)	245 (10.15)
Fluvastatin, n(%)
No	3302 (100.00)	2408 (99.79)
Yes	0	5 (0.21)
Pitavastatin, n(%)
No	3296 (99.82)	2411 (99.92)
Yes	6 (0.18)	2 (0.08)
Pravastatin, n(%)
No	3164 (95.82)	2293 (95.03)
Yes	138 (4.18)	120 (4.97)
