# Supplementary material for: Statin Use and Primary Open-Angle Glaucoma Severity in Patients of African Ancestry
Source: Research Square preprint supplement (doi:10.21203/rs.3.rs-9911540/v1), 2026-06-11
Supplement: Supplementary file 3 [file 88d4d814932be6b2f3fbd097.xlsx]

## Sheet: Sheet1
Table 3 – Endophenotypes Comparison of POAG Cases Using Statins and not Using Statins in Patients of African Ancestry in UPHS (Latest record)
Characteristic	Statistics	POAG cases not using statins	POAG cases using statins	Mean Difference (95% CI)	P-value
		(Patient=1032)	(Patient=1381)
Intraocular Pressure (mmHg)	N	2056	2755	-0.19 (-0.57, 0.18)	0.32
	Mean (SD)	16.17 (5.44)	15.98 (5.16)
	Median (Q1, Q3)	15.00 (13.00, 18.00)	15.00 (13.00, 18.00)
	Min, Max	2.0, 63.0	1.0, 70.0
Cup-to-Disc Ratio	N	1980	2681	-0.03 (-0.04, -0.01)	<0.001
	Mean (SD)	0.73 (0.18)	0.71 (0.17)
	Median (Q1, Q3)	0.75 (0.62, 0.85)	0.70 (0.60, 0.85)
	Min, Max	0.1, 1.0	0.1, 1.0
Visual Acuity	N	1857	2574	-0.10 (-0.16, -0.04)	0.001
	Mean (SD)	0.51 (0.98)	0.41 (0.89)
	Median (Q1, Q3)	0.18 (0.00, 0.48)	0.17 (0.00, 0.30)
	Min, Max	-0.1, 5.0	-0.1, 5.0
Visual Field Mean Deviation (dB)	N	1528	2061	0.72 (-0.02, 1.46)	0.06
	Mean (SD)	-8.87 (9.10)	-8.15 (8.64)
	Median (Q1, Q3)	-5.50 (-14.33, -2.15)	-5.14 (-12.00, -2.10)
	Min, Max	-34.4, 17.3	-34.7, 19.7
Pattern Standard Deviation (dB)	N	1491	2004	-0.39 (-0.66, -0.13)	0.004
	Mean (SD)	5.28 (3.47)	4.89 (3.29)
	Median (Q1, Q3)	4.15 (2.30, 7.89)	3.63 (2.23, 7.05)
	Min, Max	0.7, 18.2	0.4, 15.9
Retinal Nerve Fiber Layer (RNFL) Thickness (microns)	N	1515	2140	1.43 (0.18, 2.68)	0.03
	Mean (SD)	70.91 (15.18)	72.35 (14.47)
	Median (Q1, Q3)	70.00 (59.00, 81.00)	71.00 (62.00, 82.00)
	Min, Max	34.0, 128.0	33.0, 126.0
The p-value and difference (95% CI) are calculated based on linear regression model adjusting for inter-eye correlation with generalized estimating equation
