# Supplementary material for: Statin Use and Primary Open-Angle Glaucoma Severity in Patients of African Ancestry
Source: Research Square preprint supplement (doi:10.21203/rs.3.rs-9911540/v1), 2026-06-11
Supplement: Supplementary file 4 [file 90a43e70906826df9987d609.xlsx]

## Sheet: Sheet1
Supplemental Table 1 - Prevalence of POAG in Statin Users vs. Non-Users
Prevalent Glaucoma N = 5715 (2413 [Case] and 3302 [Control])
			Model 1*			Model 2**
Statin Use	Total N	POAG Case (%)	OR (95% CI)	P-value	Model N	OR (95% CI)	P-value	Model N
Nonuser	2364	1032 (43.7)	Ref		.	Ref		.
User	3351	1381 (41.2)	0.90 (0.81, 1.01)	0.07	5715	0.99 (0.85, 1.14)	0.84	5001
Low Potency User	745	388 (52.1)	1.40 (1.19, 1.65)	<0.001	5715	1.13 (0.91, 1.40)	0.28	5001
High Potency User	2606	993 (38.1)	0.79 (0.71, 0.89)	<0.001	5715	0.95 (0.81, 1.10)	0.5	5001
Type of Statin					.			.
Lovastatin	99	57 (57.6)	1.75 (1.17, 2.63)	0.007	2463	0.95 (0.55, 1.64)	0.86	2143
Atorvastatin	2107	811 (38.5)	0.81 (0.72, 0.91)	<0.001	4471	0.93 (0.79, 1.09)	0.35	3884
Rosuvastatin	520	194 (37.3)	0.77 (0.63, 0.93)	0.008	2884	0.95 (0.74, 1.22)	0.71	2530
Simvastatin	447	245 (54.8)	1.57 (1.28, 1.92)	<0.001	2811	1.23 (0.93, 1.62)	0.14	2451
Pravastatin	258	120 (46.5)	1.12 (0.87, 1.45)	0.38	2622	1.01 (0.73, 1.41)	0.94	2286
* Model 1: unadjusted logistic regression
** Model 2: logistic regression adjusted for age, sex, BMI, diabetes mellitus history, hypertension history, family glaucoma history, previous glaucoma surgery, tobacco use, alcohol use, beta blocker use or not
